# Supplementary material
Source: MDPI journal article supplement (https://www.mdpi.com/2305-6320/6/4/104)
Supplement: s1 [file s1]

# Supplementary Materials: Glucosamine Enhances TRAIL-Induced Apoptosis in the Prostate Cancer Cell Line DU145

Chao Sun, Viktor Chesnokov, Garrett Larson and Keiichi Itakura

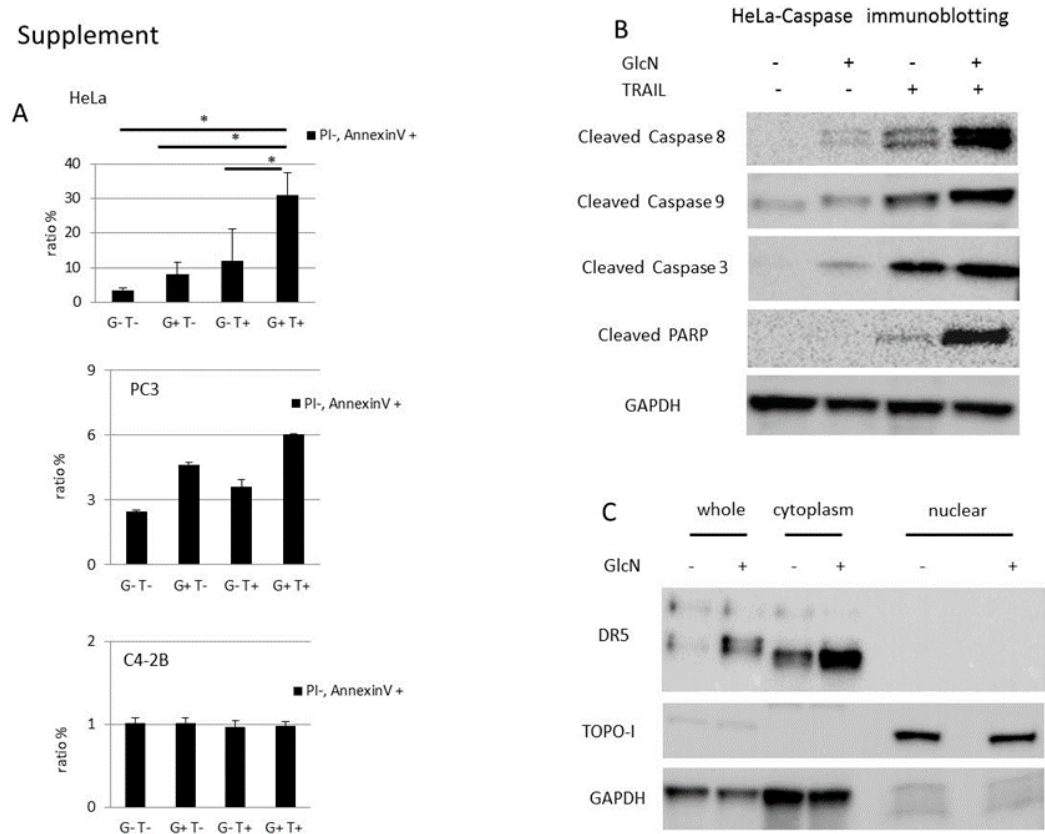

**Figure S1.** Cells insensitive to N-linked deglycosylation fail to respond to GlcN/TRAIL-induced apoptosis. (A) HeLa, PC3 or C4-2B cells were treated as in Figure 1C. After treatment, cells were stained with annexin V/PI and then analyzed by flow cytometry. Bars represent the mean value of two independent assays,  $*p < 0.05$ . (B) Immunoblot analysis of whole-cell HeLa extracts cultured as described in Figure 1C and probed with antibodies against the cleaved forms of caspases 8, 9 and 3, PARP and GAPDH. (C) DU145 cells were treated with 2 mM GlcN for 24 h and protein extracts from whole-cell, cytoplasmic or nuclear fractions were subjected to immunoblotting using a DR5 antibody. TOPO-1 and GAPDH were used as loading controls for nuclear and whole-cell/cytoplasmic extracts, respectively.
